# Supplementary material
Source: ML conference proceedings conference paper supplement (https://proceedings.mlr.press/v189/zhao23a.html)
Supplement: Supplementary file [file zhao23a-supp.pdf]

| Lang                                      | Original | Rotation | FCNN | NVP  | GBDD | Joint-Align | NORM | MUSE | MUSE+C | MUSE+G | MUSE+P | GNVP | GNVP+C | GNVP+G | GNVP+P | infoXLM | VecMap |
|-------------------------------------------|----------|----------|------|------|------|-------------|------|------|--------|--------|--------|------|--------|--------|--------|---------|--------|
| <i>Reference-free Evaluation (m-BERT)</i> |          |          |      |      |      |             |      |      |        |        |        |      |        |        |        |         |        |
| cs-en                                     | 23.6     | 32.5     | 36.2 | 30.2 | 24.4 | 32.5        | 22.5 | 24.8 | 29.7   | 26.7   | 30.4   | 24.9 | 25.3   | 25.2   | 30.5   | -       | 25.0   |
| de-en                                     | 29.8     | 31.6     | 33.1 | 34.2 | 30.0 | 39.9        | 31.4 | 29.9 | 31.3   | 31.1   | 31.2   | 32.8 | 33.0   | 32.8   | 31.3   | -       | 31.8   |
| fi-en                                     | 30.9     | 48.5     | 51.3 | 51.8 | 32.5 | 48.6        | 32.3 | 37.9 | 44.0   | 40.4   | 46.0   | 37.2 | 39.5   | 37.9   | 46.1   | -       | 39.1   |
| lv-en                                     | 23.0     | 44.0     | 50.2 | 52.1 | 25.7 | 46.1        | 31.3 | 33.4 | 35.9   | 33.5   | 40.9   | 38.0 | 40.7   | 38.8   | 41.0   | -       | 24.9   |
| ru-en                                     | 19.4     | 23.4     | 30.7 | 33.4 | 21.4 | 31.7        | 23.9 | 19.8 | 22.0   | 21.3   | 22.9   | 26.5 | 27.0   | 26.3   | 22.9   | -       | 18.7   |
| tr-en                                     | 36.7     | 52.4     | 54.8 | 52.2 | 38.6 | 48.6        | 39.1 | 41.6 | 48.6   | 46.3   | 49.7   | 44.0 | 46.5   | 44.9   | 49.8   | -       | 44.5   |
| <i>Reference-free Evaluation (XLM-R)</i>  |          |          |      |      |      |             |      |      |        |        |        |      |        |        |        |         |        |
| cs-en                                     | 20.6     | 26.3     | 26.1 | 32.9 | 22.4 | -           | 28.0 | 20.4 | 24.2   | 22.3   | 24.6   | 29.2 | 30.1   | 29.1   | 25.1   | 26.6    | -      |
| de-en                                     | 25.1     | 27.4     | 28.2 | 40.5 | 25.4 | -           | 39.5 | 25.2 | 26.5   | 26.0   | 26.6   | 40.4 | 40.4   | 40.5   | 27.2   | 37.3    | -      |
| fi-en                                     | 26.6     | 39.9     | 44.6 | 47.7 | 26.0 | -           | 41.6 | 29.0 | 35.7   | 32.3   | 37.8   | 44.3 | 47.2   | 44.5   | 38.2   | 36.1    | -      |
| lv-en                                     | 28.3     | 42.3     | 48.6 | 51.2 | 29.6 | -           | 44.1 | 30.8 | 37.9   | 32.7   | 40.7   | 47.3 | 48.7   | 47.4   | 40.9   | 38.3    | -      |
| ru-en                                     | 21.4     | 25.6     | 27.7 | 38.0 | 21.5 | -           | 34.3 | 21.5 | 23.3   | 22.4   | 24.6   | 35.9 | 36.3   | 36.1   | 25.1   | 34.9    | -      |
| tr-en                                     | 36.5     | 46.5     | 44.8 | 54.7 | 37.9 | -           | 49.6 | 38.4 | 44.7   | 41.2   | 45.9   | 53.2 | 52.9   | 51.7   | 46.2   | 52.6    | -      |
| <i>Tatoeba (m-BERT)</i>                   |          |          |      |      |      |             |      |      |        |        |        |      |        |        |        |         |        |
| cs-en                                     | 47.5     | 53.1     | 61.4 | 61.3 | 48.3 | 51.1        | 60.6 | 48.2 | 50.8   | 48.7   | 51.6   | 60.6 | 61.3   | 60.7   | 51.5   | 47.5    | -      |
| de-en                                     | 76.6     | 79.5     | 84.5 | 87.3 | 78.6 | 89.6        | 86.0 | 77.7 | 79.3   | 78.7   | 78.9   | 86.2 | 86.5   | 86.0   | 78.8   | -       | 81.2   |
| fi-en                                     | 41.5     | 50.6     | 57.2 | 54.3 | 46.4 | 70.4        | 53.5 | 44.7 | 46.5   | 45.2   | 47.8   | 53.9 | 56.1   | 54.6   | 47.5   | -       | 53.5   |
| lv-en                                     | 31.7     | 39.8     | 47.4 | 51.2 | 35.0 | 31.1        | 44.0 | 35.3 | 35.0   | 33.8   | 37.1   | 44.1 | 44.7   | 43.8   | 37.0   | -       | 33.5   |
| ru-en                                     | 63.0     | 65.7     | 70.3 | 72.6 | 64.8 | 74.2        | 75.4 | 63.5 | 64.9   | 64.7   | 66.3   | 75.1 | 76.0   | 75.1   | 66.3   | -       | 66.5   |
| tr-en                                     | 35.8     | 43.0     | 46.3 | 50.5 | 40.6 | 38.4        | 48.2 | 39.1 | 40.9   | 38.8   | 43.1   | 47.3 | 49.3   | 48.1   | 42.6   | -       | 47.6   |
| <i>Tatoeba (XLM-R)</i>                    |          |          |      |      |      |             |      |      |        |        |        |      |        |        |        |         |        |
| cs-en                                     | 49.8     | 57.5     | 74.6 | 72.9 | 59.2 | -           | 72.5 | 53.8 | 58.9   | 60.6   | 59.1   | 72.8 | 74.0   | 73.3   | 57.6   | 69.6    | -      |
| de-en                                     | 89.0     | 91.0     | 94.5 | 94.9 | 90.1 | -           | 95.2 | 88.7 | 91.0   | 89.6   | 90.8   | 94.6 | 95.2   | 94.8   | 90.5   | 95.5    | -      |
| fi-en                                     | 63.8     | 68.6     | 81.3 | 80.8 | 69.3 | -           | 79.6 | 65.6 | 69.8   | 67.2   | 68.8   | 80.6 | 81.2   | 80.6   | 67.7   | 68.4    | -      |
| lv-en                                     | 52.2     | 61.3     | 72.6 | 72.4 | 58.9 | -           | 71.9 | 56.4 | 63.1   | 59.2   | 61.0   | 71.5 | 71.5   | 71.7   | 59.7   | 51.2    | -      |
| ru-en                                     | 70.2     | 71.5     | 83.1 | 83.9 | 73.2 | -           | 83.9 | 71.2 | 70.6   | 70.2   | 72.2   | 83.4 | 84.2   | 84.0   | 70.9   | 85.7    | -      |
| tr-en                                     | 55.4     | 61.7     | 75.1 | 75.6 | 62.4 | -           | 75.4 | 58.6 | 62.0   | 63.2   | 61.0   | 75.1 | 76.9   | 75.7   | 61.3   | 86.1    | -      |
| <i>Contextual BLI (m-BERT)</i>            |          |          |      |      |      |             |      |      |        |        |        |      |        |        |        |         |        |
| cs-en                                     | 47.3     | 52.6     | 49.2 | 52.3 | 47.7 | 57.0        | 50.1 | 47.7 | 50.0   | 48.4   | 50.8   | 51.8 | 52.0   | 51.5   | 51.0   | -       | 55.1   |
| de-en                                     | 61.0     | 64.6     | 59.0 | 63.8 | 60.9 | 79.4        | 63.3 | 61.8 | 61.8   | 62.1   | 62.5   | 64.8 | 64.8   | 64.7   | 63.0   | -       | 71.7   |
| fi-en                                     | 36.8     | 48.9     | 45.8 | 45.8 | 37.9 | 74.2        | 43.0 | 40.7 | 40.6   | 40.7   | 43.4   | 45.0 | 47.6   | 44.7   | 44.6   | -       | 56.7   |
| lv-en                                     | 42.7     | 51.8     | 49.5 | 50.6 | 43.5 | 49.8        | 47.9 | 45.5 | 44.5   | 45.9   | 48.7   | 49.9 | 50.5   | 49.7   | 49.5   | -       | 53.9   |
| ru-en                                     | 66.5     | 70.9     | 67.6 | 71.4 | 67.0 | 67.4        | 69.2 | 67.2 | 67.5   | 67.8   | 69.5   | 70.5 | 71.0   | 70.6   | 69.9   | -       | 76.9   |
| tr-en                                     | 51.1     | 61.9     | 60.7 | 61.8 | 51.5 | 60.2        | 55.8 | 52.0 | 52.8   | 53.7   | 56.4   | 60.2 | 62.1   | 58.7   | 58.3   | -       | 70.4   |
| <i>Contextual BLI (XLM-R)</i>             |          |          |      |      |      |             |      |      |        |        |        |      |        |        |        |         |        |
| cs-en                                     | 40.2     | 45.1     | 43.6 | 51.1 | 39.3 | -           | 48.2 | 41.6 | 42.0   | 41.5   | 42.3   | 49.8 | 50.0   | 49.6   | 43.3   | 50.7    | -      |
| de-en                                     | 54.1     | 57.9     | 53.2 | 64.6 | 54.3 | -           | 62.7 | 55.2 | 55.1   | 55.3   | 55.4   | 65.1 | 65.3   | 64.9   | 56.3   | 67.3    | -      |
| fi-en                                     | 44.2     | 51.0     | 46.1 | 60.9 | 44.0 | -           | 58.1 | 46.8 | 45.7   | 47.2   | 46.6   | 60.2 | 60.5   | 59.9   | 48.3   | 57.1    | -      |
| lv-en                                     | 44.2     | 50.0     | 48.3 | 57.6 | 44.2 | -           | 54.8 | 46.4 | 45.7   | 47.3   | 46.5   | 56.9 | 57     | 56.7   | 47.8   | 53.5    | -      |
| ru-en                                     | 60.9     | 64.4     | 60.3 | 71.7 | 60.7 | -           | 70.3 | 61.4 | 61.8   | 61.2   | 62.2   | 71.5 | 71.5   | 71.4   | 63.0   | 72.4    | -      |
| tr-en                                     | 47.9     | 53.6     | 53.8 | 63.9 | 48.0 | -           | 60.1 | 48.6 | 48.5   | 48.6   | 49.2   | 62.5 | 63.1   | 62.5   | 50.9   | 64.0    | -      |
| <i>Word Alignment (m-BERT)</i>            |          |          |      |      |      |             |      |      |        |        |        |      |        |        |        |         |        |
| cs-en                                     | 44.0     | 45.0     | 43.4 | 45.7 | 44.1 | 44.2        | 44.6 | 44.0 | 45.0   | 44.5   | 45.0   | 44.6 | 45.1   | 44.9   | 45.1   | -       | 45.0   |
| de-en                                     | 79.1     | 80.6     | 79.6 | 79.5 | 79.3 | 80.2        | 80.5 | 79.3 | 80.2   | 79.9   | 80.4   | 80.0 | 80.3   | 80.2   | 80.5   | -       | 80.0   |
| <i>Word Alignment (XLM-R)</i>             |          |          |      |      |      |             |      |      |        |        |        |      |        |        |        |         |        |
| cs-en                                     | 41.1     | 42.1     | 41.8 | 45.2 | 40.9 | -           | 44.4 | 41.2 | 42.1   | 41.8   | 42.1   | 44.6 | 44.9   | 44.8   | 42.0   | 43.3    | -      |
| de-en                                     | 78.5     | 79.6     | 77.9 | 80.5 | 78.7 | -           | 80.8 | 78.8 | 78.9   | 79.2   | 79.1   | 81.0 | 81.4   | 81.2   | 79.0   | 82.6    | -      |

Table 4: Full results of baselines and our approaches. Real-NVP and GAN-Real-NVP are denoted by NVP and GNVP. [Method]+P/C/G denotes the integration in Procrustes refinement (P), in our bootstrapping procedure constrained with cross-correlation (C) and with graph structure (G).
